# Supplementary material
Source: MDPI journal article supplement (https://www.mdpi.com/2076-3417/13/11/6846)
Supplement: s1 [file s1]

Supplementary Materials

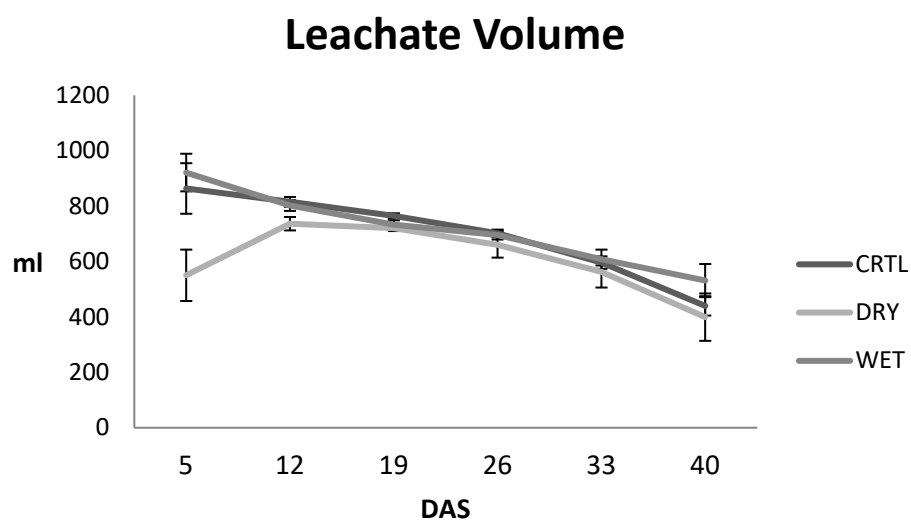

**Figure S1.** Mean volume of the leachates measured at each sampling indicated by the days after sowing, for the tree substrates CTRL, DRY and WET (mean  $\pm$  Std. Dev.,  $n = 4$ ).

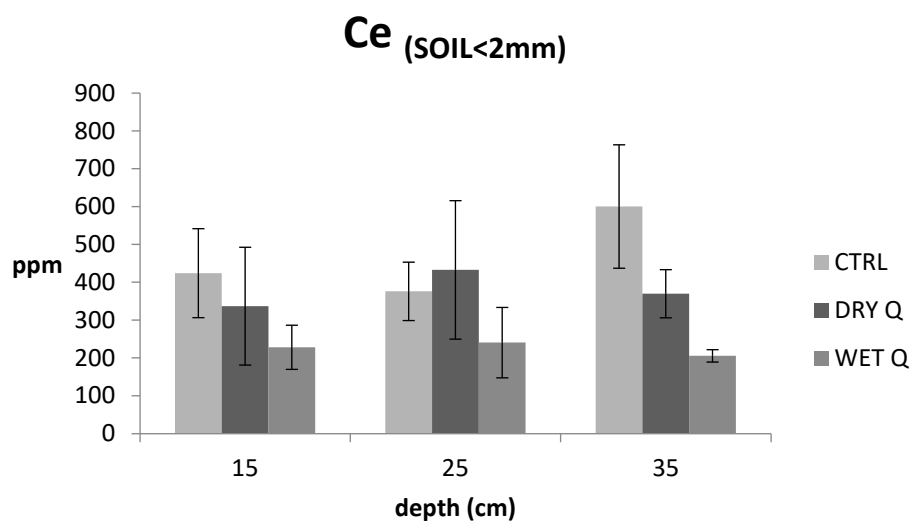

**Figure S2.** Mean soil total content of Ce measured at three depths (15, 25 and 35cm), at the end of the experiment, for the tree substrates CTRL, DRY and WET (mean  $\pm$  Std. Dev.,  $n = 4$ ).

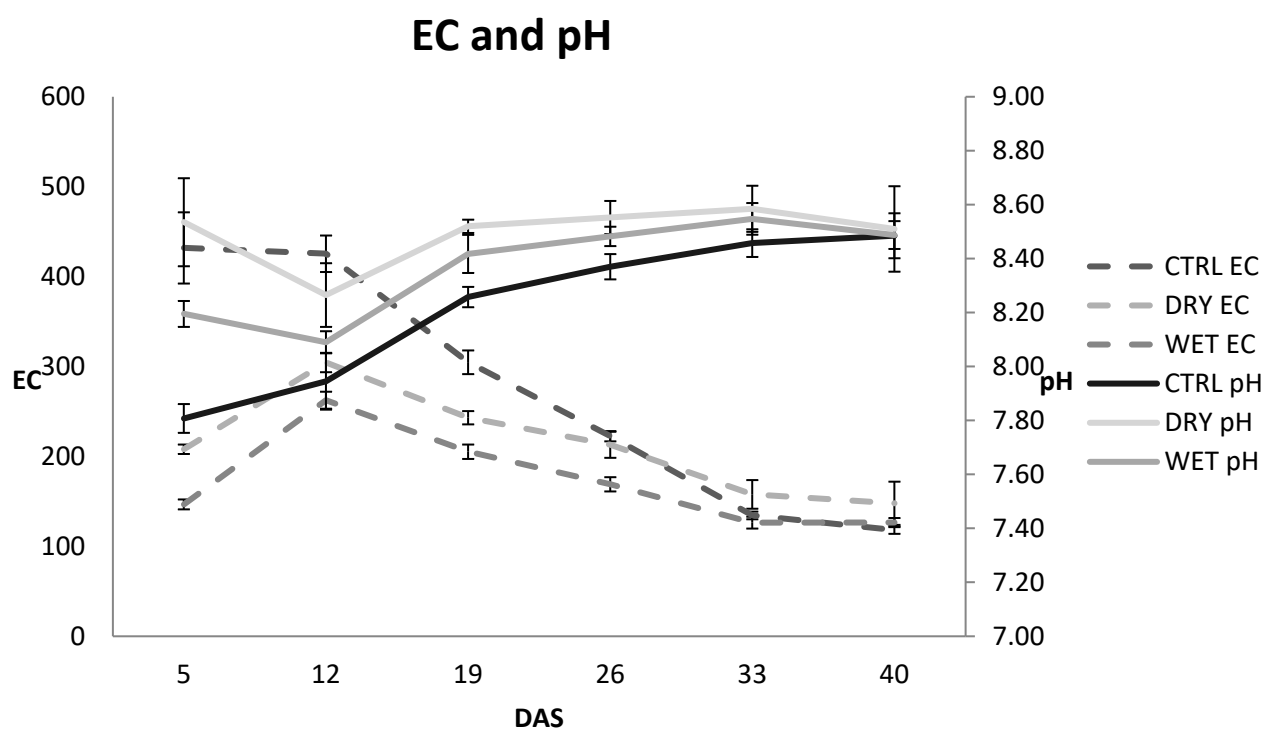

**Figure S3.** Electric Conductivity (EC) and pH of the leachates collected after each irrigation of the three substrates (CTRL, DRY, WET) (6 samplings; n = 4).
